# Supplementary material for: The classical and alternative circulating renin‐angiotensin system in normal dogs and dogs with stage B1 and B2 myxomatous mitral valve disease
Source: PubMed Central journal article supplement — J Vet Intern Med. 2023 Mar 23;37(3):875–86. doi: 10.1111/jvim.16687 (PMC10229370; doi:10.1111/jvim.16687), 2023-03-23
Supplement: JVIM-37-875-s002.pdf [file JVIM-37-875-s002.pdf]

### Supplemental Table

The ratio of the two medians and the confidence interval around this ratio is shown below for variables that differed significantly prior to controlling for the covariates of age and time between the last meal and blood sampling. ACE<sub>surr</sub>: surrogate measure of angiotensin converting enzyme activity (AngII / AngI); ACE2<sub>surr</sub>: surrogate measure of angiotensin converting enzyme 2 activity (Ang 1,5 / AngII); AA2<sub>surr</sub>: surrogate of adrenal responsiveness to angiotensin II (Aldo / AngII); Aldo: aldosterone; ALT<sub>surr</sub>: surrogate measure of alternative renin-angiotensin system activity (Ang1,7 + Ang1,5) / (Ang1+AngII+Ang1,7+Ang1,5). \*Differs significantly between groups prior to controlling for covariates. †Differed significantly between groups after controlling for covariates.

| Analyte                                     | P Value<br>(Welch's<br>ANOVA) | B2:B1 | 95% Confidence<br>Limits | B2:Normal | 95% Confidence<br>Limits | B1:Normal | 95% Confidence<br>Limits |
|---------------------------------------------|-------------------------------|-------|--------------------------|-----------|--------------------------|-----------|--------------------------|
| Ang1,7 (pmol/L)                             | .03                           | 1.063 | .68 – 1.65               | 1.58*     | 1.071 – 2.33             | 1.49*     | 1.031 – 2.14             |
| ACE <sub>surr</sub><br>([pmol/L]/[pmol/L])  | .03                           | 1.19  | .65 – 1.12               | .72*      | .57 – .91                | .84       | .67 – 1.05               |
| ACE2 <sub>surr</sub><br>([pmol/L]/[pmol/L]) | .0005                         | 1.51* | 1.075 – 2.12             | 1.89*†    | 1.40 – 2.56              | 1.25      | .95 – 1.66               |
| ALT <sub>surr</sub><br>([pmol/L]/[pmol/L])  | .001                          | 1.12  | .94 – 1.34               | 1.26*     | 1.078 – 1.47             | 1.12      | .97 – 1.30               |
